# Supplementary material
Source: publisher site journal article supplement (https://static.cambridge.org/content/id/urn:cambridge.org:id:article:S0007114520000264/resource/name/S0007114520000264supp002.docx)
Supplement: Supplementary file 1 [file S0007114520000264supp002.docx]

Full search strategy in MEDLINE

|  | **Search Statement** | **Results** | **Annotation** |
| --- | --- | --- | --- |
| 1 | Diabetes, Gestational/ | 9152 |  |
| 2 | (pregnan* adj1 diabet*).ti. | 1496 |  |
| 3 | (gestational adj1 diabet*).ti. | 7095 |  |
| 4 | GDM.ti. | 227 |  |
| 5 | or/1-4 | 12173 |  |
| 6 | infant/ or infant, newborn/ | 1079150 |  |
| 7 | (infant or infants or newborn* or neonat*).ti,ab,kf. | 636704 |  |
| 8 | or/6-7 | 1310359 |  |
| 9 | Infant Nutritional Physiological Phenomena/ | 14335 |  |
| 10 | (infant nutrition* or infant feed* or infant food* or infant diet*).ti,ab,kf. | 12275 |  |
| 11 | Breast Feeding/ | 34833 |  |
| 12 | (breastfeed* or breastfed or breast feed* or breast fed).ti,ab,kf. | 40485 |  |
| 13 | Milk, Human/ | 18020 |  |
| 14 | (breastmilk or breast milk or human milk).ti,ab,kf. | 21459 |  |
| 15 | LACTATION/ | 38718 |  |
| 16 | lactat*.ti,ab,kf. | 150396 |  |
| 17 | Infant Formula/ | 4004 |  |
| 18 | (formula adj (milk* or feed* or fed or food*)).ti,ab,kf. | 4035 |  |
| 19 | infant formula.ti,ab,kf. | 3654 |  |
| 20 | Weaning/ | 10310 |  |
| 21 | wean*.ti,ab,kf. | 44476 |  |
| 22 | ((solid* or semisolid* or semi solid* or soft) adj (feed* or food*or diet*)).ti,ab,kf. | 254 |  |
| 23 | ((complementary or supplement*) adj (feed* or food* or diet*)).ti,ab,kf. | 9700 |  |
| 24 | APPETITE/ | 7256 |  |
| 25 | appetit*.ti,ab,kf. | 27999 |  |
| 26 | Feeding Behavior/ | 75733 |  |
| 27 | ((feeding or eating) adj1 behavi*or habit*).ti,ab,kf. | 1 |  |
| 28 | Energy Intake/ | 38261 |  |
| 29 | ((Energy or Protein or Carbohydrate or Fat) adj intake*).ti,ab,kf. | 33857 |  |
| 30 | (diet* adj2 diversi*).ti,ab,kf. | 1346 |  |
| 31 | food frequenc*.ti,ab,kf. | 11040 |  |
| 32 | Nutrition Surveys/ or Diet Surveys/ | 23246 |  |
| 33 | ((nutrition* or diet*) adj (survey* or question*)).ti,ab,kf. | 6386 |  |
| 34 | or/9-33 | 443988 |  |
| 35 | body size/ or body height/ or body weight/ | 214025 |  |
| 36 | (height or weight or length).ti,ab,kf. | 1358620 |  |
| 37 | body mass index/ | 113986 |  |
| 38 | (body mass or BMI).ti,kf,ab. | 239213 |  |
| 39 | ((head or abdominal) adj circumference*).ti,ab,kf. | 8219 |  |
| 40 | Skinfold Thickness/ | 5967 |  |
| 41 | (skin fold thickness* or skinfold thickness*).ti,ab,kf. | 5058 |  |
| 42 | body composition/ or body fat distribution/ | 40842 |  |
| 43 | (body fat or body composition).ti,ab,kf. | 52545 |  |
| 44 | ((fat or fat free or lean) adj mass).ti,ab,kf. | 20615 |  |
| 45 | z score*.ti,ab,kf. | 18770 |  |
| 46 | or/35-45 | 1664603 |  |
| 47 | 34 or 46 | 2000925 |  |
| 48 | 5 and 8 and 47 | 2012 |  |
| 49 | screen*.ti. | 158754 |  |
| 50 | 48 not 49 | 1953 |  |
| 51 | (control or no* GDM or compar*).ti,ab,kf. | 6364586 |  |
| 52 | 50 and 51 | 1287 |  |
